# Supplementary material
Source: publisher site journal article supplement (https://www.dovepress.com/article/307561)

# Questionnaire for hematologic-oncologic patients during COVID19 pandemic

Dear patient,

We ask you to fill in the following anonymous questionnaire about your treatment experience during the Covid-19 era. We wish to improve patients safety and management based on your responses.

This study was approved by the Institutional Ethics Committee.

In case you have already answered this questionnaire, please do not answer again.

We thank you for your cooperation,

The hematology team, Tel Aviv Sourasky medical center.

Please answer the questions in sections A-G: (you can mark few answers as correct answers)

Section A:

Sex:

Male

Female

Age:

Your answer

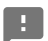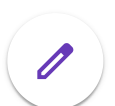

Marital status:

- Married / living with a partner
- Single
- Widowed
- Divorced / separated

Number of children:

Your answer

Number of children living with you:

Your answer

Number of rooms in the house:

Your answer

Education level:

- High school graduate or less
- Post-secondary or vocational education
- Academic degree
- Other:

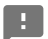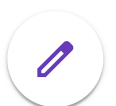

## Section B:

Compared to Influenza, what do you think about COVID 19 transmission?

- COVID 19 is less contagious than Influenza
- COVID 19 is more contagious than Influenza
- COVID 19 and Influenza are similarly contagious

What are the transmission routes of COVID 19? (Select all that apply)

- Airborne (for hours)
- Droplets (transmitted by close contact)
- Urine
- Saliva
- Mosquito bite
- Cockroaches/mice

How can people protect themselves from COVID 19? (Select all that apply)

- No protection is needed
- Hand washing and frequent use of disinfectants
- Keeping social and physical distancing
- Wearing a face mask
- Using gloves
- Avoid touching eyes, nose and mouth

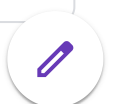

During COVID19 pandemic, do you leave home other than for medical reasons?  
(for example, to the grocery store)

Yes

No

Which protective measures do you use when you go out? (Select all that apply)

No preventive measures

Frequent hand washing

Social and physical distancing

Wearing a face mask

Using gloves

Avoid touching eyes, nose and mouth

Using disinfectants

During COVID 19 pandemic, do you invite guests to your house?

Yes

No

**Section C:**

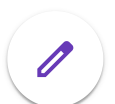

What is your Hematologic diagnosis?

- Hodgkin's lymphoma
- Non-Hodgkin's lymphoma
- Indolent lymphoma
- Aggressive Non-Hodgkin's lymphoma
- Non-Hodgkin's lymphoma (unknown type)
- Multiple myeloma
- Acute leukemia
- Chronic lymphocytic leukemia (CLL)
- Don't know my diagnosis
- Other:

How long ago have you been diagnosed? (please mention years/months):

Your answer

What is the current status of your disease?

- During therapy, started before March 2020
- During therapy, started after March 2020
- Completed therapy > 1 year ago
- Completed therapy within less than a year

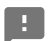

Please provide more information regarding your hematological treatment (for actively treated patients)

- Taking pills at home only
- Receiving treatment in the hospital (infusions into the vein or under the skin)
- Receiving pills at home and additional therapy in the hospital
- I don't receive therapy

What was the frequency of your appointments with your medical Doctor in the pre-Covid-19 era?

- Once every 2-3 weeks
- Once per month
- Once every 2-4 months
- Once every 6-12 months
- Other:

In case you receive therapy at the hospital, what was the frequency of your visits in the outpatient day-care, in the pre-Covid-19 era?

- More than 3 times a month
- 1-2 each month
- Once every 2-3 months
- I don't arrive at the hospital
- Other:

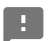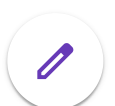

How often do you have a doctors follow-up (at the clinic or remotely) during COVID 19 pandemic?

- 2-3 times a month
- Once a month
- Once every 2-3 months
- Once every 6 months
- Once a year
- Other:

In case you receive therapy at the hospital, how often are you attending at the day-hospitalization, during COVID 19 pandemic?

- 2-3 times a month
- Once a month
- Once every 2-3 months
- Once every 6 months
- Once a year
- Other:

During COVID 19 pandemic, have you avoided performing pre-scheduled blood tests?

- Yes
- No
- Irrelevant

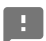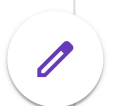

In case you answered 'yes' on the previous question, have you informed your physician/other members in the medical team?

- Yes
- No
- Irrelevant

During COVID 19 pandemic, have you avoided performing pre-scheduled imaging tests?

- Yes
- No
- Irrelevant

In case you answered 'yes' on the previous question, have you informed your physician/other members in the medical team?

- Yes
- No
- Irrelevant

As far as you know, were there any changes made in your treatment plan, during COVID 19 period?

- Yes
- No
- Irrelevant

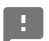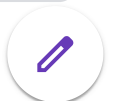



Section D:

Please rate your anxiety of attending the hospital during the COVID 19 outbreak (before protective measures were taken by the hospital and hematology team)

|            |                       |                       |                       |                       |                       |                       |           |
|------------|-----------------------|-----------------------|-----------------------|-----------------------|-----------------------|-----------------------|-----------|
|            | 1                     | 2                     | 3                     | 4                     | 5                     | 6                     |           |
| not at all | <input type="radio"/> | very much |

Which protective measures do you use when you attend the hospital? (Select all that apply)

- No prevention measures
- Frequent hand washing
- Social and physical distancing
- Wearing a face mask
- Using gloves
- Avoid touching eyes, nose and mouth
- Using disinfectants
- Using face-shield

Please rate your anxiety level of attending the hospital during COVID 19 outbreak, after protective measures were taken by the hospital and the hematology team

|               |                       |                       |                       |                       |                       |                       |                  |
|---------------|-----------------------|-----------------------|-----------------------|-----------------------|-----------------------|-----------------------|------------------|
|               | 1                     | 2                     | 3                     | 4                     | 5                     | 6                     |                  |
| not concerned | <input type="radio"/> | highly concerned |



**Section E:**

Did you receive instructions (by text / email / phone call) regarding hospital preparation during the COVID 19 pandemic?

- Yes
- No

To what extent do you think that the hospital took measures to reduce patient's exposure to COVID 19?

- Not at all
- Slightly
- Moderate
- Very much

**Please rate your satisfaction of each one of the following protection measures, taken in order to minimize your exposure to COVID 19 during your staying in the hospital**

0 indicates "irrelevant to me", 1 indicates "not significant at all" and 6 indicates "very significant"

Separate path to the hematology day-care/clinic (to minimize exposure of patients to other visitors)

|                  |                       |                       |                       |                       |                       |                       |                       |                  |
|------------------|-----------------------|-----------------------|-----------------------|-----------------------|-----------------------|-----------------------|-----------------------|------------------|
|                  | 0                     | 1                     | 2                     | 3                     | 4                     | 5                     | 6                     |                  |
| irrelevant to me | <input type="radio"/> | very significant |

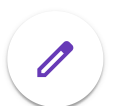

Minimizing visitors

0 1 2 3 4 5 6

irrelevant to me        very significant

Protective measures taken by medical staff (masks, etc..)

0 1 2 3 4 5 6

irrelevant to me        very significant

Reduction the number of patients currently staying in the clinic and day-care

0 1 2 3 4 5 6

irrelevant to me        very significant

Applying virtual medicine

0 1 2 3 4 5 6

irrelevant to me        very significant

Applying home therapy

0 1 2 3 4 5 6

irrelevant to me        very significant

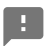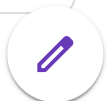

Applying 'drive-in' therapy

0    1    2    3    4    5    6

irrelevant to me                                very significant

**Section F:**

What was the mode of communication with your medical staff before COVID 19 pandemic? (select all that apply)

- I called / sent a text message / sent an email
- The medical staff called me / sent a text message / sent an email
- My doctor scheduled virtual appointments

What is the current mode of communication with the medical staff? (select all that apply)

- I call / send a text message / send an email
- The medical staff calls me / sends a text message / sends an email
- My doctor schedules a virtual meeting

Are you satisfied with having virtual meetings during the Covid-19 era?

- Not satisfied
- Slightly satisfied
- Moderately satisfied
- Very much satisfied

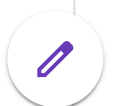

Would you be interested in having virtual meetings after the Covid-19 outbreak would end?

- Not at all
- Slightly
- Moderately
- Very much

How would you rate your satisfaction of the current communication with the medical team

- 1      2      3      4      5      6
- not at all satisfied                            very satisfied

**Section G:**

How would you rate the impact of Covid 19 pandemic on the quality of your treatment?

- Adversely affected
- Slightly adversely affected
- No impact
- Improved
- Highly improved

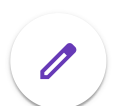

In case of an urgent problem beyond the regular working hours (for example: at night or weekend), who would you contact first for help?

- Wait for regular working hours
- Contact my hematologist directly
- Contact my family doctor
- Contact the hospitals coordinating nurse
- Attend the emergency room
- Attend the community medical center
- Call for an ambulance

Submit

Never submit passwords through Google Forms.

This content is neither created nor endorsed by Google. [Report Abuse](#) - [Terms of Service](#) - [Privacy Policy](#).

Google Forms

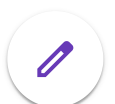

Supplement: Supplementary file 1 [file get_supplementary_file.php]
